# Supplementary material for: Ecology of Subseafloor Crustal Biofilms
Source: Front Microbiol. 2019 Aug 28;10:1983. doi: 10.3389/fmicb.2019.01983 (PMC6736579; doi:10.3389/fmicb.2019.01983)
Supplement: Supplementary file 1 [file Data_Sheet_1.CSV]

bin	phylosift_annotation	16S_length	16S_closest_neighbor	16S_perc_identity	16S_len_align	FLOCS_amplicon_match	amplicon_taxa	identity_with_amplicon	amplicon_len_align
metabatBin-sensitive.29.fa.contigs.fa-contigs.fa	Bacteria-mixed_5-PLANKTON	1956	Uncultured fungus clone nco39g09c1 18S ribosomal RNA gene	99.757	1643	plankton	NA	NA	NA
Bin_55-contigs.fa	Variovorax-PLANKTON	1527	Uncultured bacterium clone K1-362. 16S ribosomal RNA gene	98.154	1517	plankton	NA	NA	NA
metabatBin-superspecific.73.fa.contigs.fa-contigs.fa	Dehalococcoida-PLANKTON	1492	Uncultured archaeon clone F99a13 16S ribosomal RNA gene	95.706	1444	plankton	NA	NA	NA
Bin_66-contigs.fa	Bacteria-mixed_2-PLANKTON	1521	Uncultured bacterium clone bac213c 16S ribosomal RNA gene	95.03	1509	plankton	NA	NA	NA
Bin_79-contigs.fa	Chloroflexi_1-PLANKTON	1502	Uncultured bacterium clone Butane50_mme_844_Bact 16S ribosomal RNA gen - Nucleotide - NCBI</title	94.849	1456	plankton	NA	NA	NA
metabatBin-sensitive.26.fa.contigs.fa-contigs.fa	Chloroflexi_2-PLANKTON	1533	Uncultured bacterium clone 1WB_14 small subunit ribosomal RNA gene	93.942	1436	plankton	NA	NA	NA
metabatBin-sensitive.15.fa.contigs.fa-contigs.fa	Bacteria-mixed_3-PLANKTON	1516	Uncultured bacterium clone MD2896-B168 16S ribosomal RNA gene	91.964	1431	plankton	NA	NA	NA
metabatBin-superspecific.3.fa.contigs.fa-contigs.fa	Chloroflexi_3-PLANKTON	391	Uncultured bacterium clone CarbonSeq13a_030410_H02 16S ribosomal RNA g - Nucleotide - NCBI</title	89.323	384	plankton	NA	NA	NA
Bin_61-contigs.fa	Bacteria-mixed_1-PLANKTON	1607	Uncultured bacterium clone FS266-19B-03 16S ribosomal RNA gene	87.347	1470	plankton	NA	NA	NA
metabatBin-verysensitive.50.fa.contigs.fa-contigs.fa	Thermotogae-PLANKTON	1504	Uncultured bacterium clone MC118_11-13_bac58 16S ribosomal RNA gene	84.471	1436	plankton	NA	NA	NA
metabatBin-sensitive.64.fa.contigs.fa-contigs.fa	Candidate_division-PLANKTON	1543	Uncultured bacterium gene for 16S rRNA	83.782	1338	plankton	NA	NA	NA
metabatBin-superspecific.83.fa.contigs.fa-contigs.fa	Aquificae-FLOCS	1580	Uncultured bacterium clone SSF23-24_1362B11_032 16S ribosomal RNA gene - Nucleotide - NCBI</title	99.556	901	Otu00028	Bacteria(100);OPS8(100);OPS8_unclassified(100);OPS8_unclassified(100);OPS8_unclassified(100);OPS8_unclassified(100);OPS8_unclassified(100);OPS8_unclassified(100);OPS8_unclassified(100);OPS8_unclassified(100);OPS8_unclassified_unclassified(100);	100	343
metabatBin-superspecific.16.fa.contigs.fa-contigs.fa	Chloroflexi-FLOCS	1592	Delftia sp. HK171 chromosome	98.96	1539	Otu00006	Bacteria(100);Proteobacteria(100);Betaproteobacteria(100);Burkholderiales(100);Comamonadaceae(100);Delftia(100);Delftia_unclassified(100);Delftia_unclassified(100);Delftia_unclassified(100);Delftia_unclassified(100);Delftia_unclassified_unclassified(100);	100	320
metabatBin-sensitive.53.fa.contigs.fa-contigs.fa	Unclassified-microbe_2-FLOCS	1576	Uncultured bacterium clone BAC2_50 16S ribosomal RNA gene	97.659	1538	Otu00210	Bacteria(100);Candidate_division_OP1(100);Candidate_division_OP1_unclassified(100);Candidate_division_OP1_unclassified(100);Candidate_division_OP1_unclassified(100);Candidate_division_OP1_unclassified(100);Candidate_division_OP1_unclassified(100);Candidate_division_OP1_unclassified(100);Candidate_division_OP1_unclassified(100);Candidate_division_OP1_unclassified(100);Candidate_division_OP1_unclas…	100	350
metabatBin-superspecific.33.fa.contigs.fa-contigs.fa	Unclassfied-microbe_3-FLOCS	1575	Uncultured bacterium clone BAC2_50 16S ribosomal RNA gene	97.529	1538	Otu00656	Bacteria(100);Candidate_division_OP1(100);Candidate_division_OP1_unclassified(100);Candidate_division_OP1_unclassified(100);Candidate_division_OP1_unclassified(100);Candidate_division_OP1_unclassified(100);Candidate_division_OP1_unclassified(100);Candidate_division_OP1_unclassified(100);Candidate_division_OP1_unclassified(100);Candidate_division_OP1_unclassified(100);Candidate_division_OP1_unclas…	100	349
metabatBin-superspecific.28.fa.contigs.fa-contigs.fa	Bacteria-mixed_3-FLOCS	422	Uncultured bacterium clone BAC_OTU_44 16S ribosomal RNA gene	97.108	415	Otu00120	Bacteria(100);Candidate_division_OP1(100);Candidate_division_OP1_unclassified(100);Candidate_division_OP1_unclassified(100);Candidate_division_OP1_unclassified(100);Candidate_division_OP1_unclassified(100);Candidate_division_OP1_unclassified(100);Candidate_division_OP1_unclassified(100);Candidate_division_OP1_unclassified(100);Candidate_division_OP1_unclassified(100);Candidate_division_OP1_unclas…	100	349
Bin_67-contigs.fa	Desulfarculus-FLOCS	1573	Uncultured bacterium UASB_TL19 16S ribosomal RNA gene	93.653	1481	Otu00014	Bacteria(100);Proteobacteria(100);Deltaproteobacteria(100);Desulfarculales(100);Desulfarculaceae(100);Desulfarculus(100);Desulfarculus_unclassified(100);Desulfarculus_unclassified(100);Desulfarculus_unclassified(100);Desulfarculus_unclassified(100);Desulfarculus_unclassified_unclassified(100);	100	344
metabatBin-verysensitive.16.fa.contigs.fa-contigs.fa	Bacteria-mixed_4-FLOCS	1515	Uncultured bacterium clone PM-150-Bact-03 16S ribosomal RNA gene	89.878	1472	Otu00192	Bacteria(100);Bacteria_unclassified(100);Bacteria_unclassified(100);Bacteria_unclassified(100);Bacteria_unclassified(100);Bacteria_unclassified(100);Bacteria_unclassified(100);Bacteria_unclassified(100);Bacteria_unclassified(100);Bacteria_unclassified(100);Bacteria_unclassified_unclassified(100);	100	327
metabatBin-sensitive.21.fa.contigs.fa-contigs.fa	Bacteria-mixed_2-FLOCS	1572	Uncultured bacterium clone 1H3C142 16S ribosomal RNA gene	89.519	1498	Otu00046	Bacteria(100);Bacteria_unclassified(100);Bacteria_unclassified(100);Bacteria_unclassified(100);Bacteria_unclassified(100);Bacteria_unclassified(100);Bacteria_unclassified(100);Bacteria_unclassified(100);Bacteria_unclassified(100);Bacteria_unclassified(100);Bacteria_unclassified_unclassified(100);	100	344
Bin_71-contigs.fa	Bacteria-mixed_1-FLOCS	1581	Uncultured bacterium clone SSE_L2_G02 16S ribosomal RNA gene	88.006	1409	Otu00148	Bacteria(100);OPS8(100);OPS8_unclassified(100);OPS8_unclassified(100);OPS8_unclassified(100);OPS8_unclassified(100);OPS8_unclassified(100);OPS8_unclassified(100);OPS8_unclassified(100);OPS8_unclassified(100);OPS8_unclassified_unclassified(100);	100	336
metabatBin-sensitive.10.fa.contigs.fa-contigs.fa	Unlcassified-microbe_1-FLOCS	1549	Uncultured bacterium clone 1301APX_E06 16S ribosomal RNA gene	100	1462	Otu00050	Bacteria(100);Candidate_division_OP8(100);Candidate_division_OP8_unclassified(100);Candidate_division_OP8_unclassified(100);Candidate_division_OP8_unclassified(100);Candidate_division_OP8_unclassified(100);Candidate_division_OP8_unclassified(100);Candidate_division_OP8_unclassified(100);Candidate_division_OP8_unclassified(100);Candidate_division_OP8_unclassified(100);Candidate_division_OP8_unclas…	99.695	328
metabatBin-verysensitive.5.fa.contigs.fa-contigs.fa	Syntrophaceae-FLOCS	1584	Uncultured bacterium clone RS-A080 16S ribosomal RNA gene	94.79	1574	Otu00031	Bacteria(100);Proteobacteria(100);Deltaproteobacteria(100);Deltaproteobacteria_unclassified(100);Deltaproteobacteria_unclassified(100);Deltaproteobacteria_unclassified(100);Deltaproteobacteria_unclassified(100);Deltaproteobacteria_unclassified(100);Deltaproteobacteria_unclassified(100);Deltaproteobacteria_unclassified(100);Deltaproteobacteria_unclassified_unclassified(100);	99.138	348
metabatBin-sensitive.2.fa_sub.contigs.fa-contigs.fa	Cupriavidus-FLOCS	1493	Cupriavidus metallidurans CH34 megaplasmid	100	1537	Otu00108	Bacteria(100);Proteobacteria(100);Betaproteobacteria(100);Burkholderiales(100);Burkholderiaceae(100);Cupriavidus(100);Cupriavidus_unclassified(100);Cupriavidus_unclassified(100);Cupriavidus_unclassified(100);Cupriavidus_unclassified(100);Cupriavidus_unclassified_unclassified(100);	99.068	322
